# Supplementary material for: An improved Escherichia coli strain to host gene regulatory networks involving both the AraC and LacI inducible transcription factors
Source: PubMed Central journal article supplement (PMC3881499; doi:10.1186/1754-1611-8-2), 2014-01-02
Supplement: 1754-1611-8-2-S1.pdf [file 1754-1611-8-2-S1.pdf]

## Additional file 1

### An improved *Escherichia coli* strain to host gene regulatory networks involving both the AraC and LacI inducible transcription factors

Manjunatha Kogenaru<sup>1,2,3\*</sup> and Sander J. Tans<sup>1</sup>

<sup>1</sup>FOM Institute for Atomic and Molecular Physics, Science Park 104, 1098 XG Amsterdam, The Netherlands,

<sup>2,3</sup>Present address: <sup>2</sup>EMBL/CRG Systems Biology Research Unit, Centre for Genomic Regulation (CRG), Dr. Aiguader 88, 08003 Barcelona, Spain. <sup>3</sup>Universitat Pompeu Fabra (UPF), 08003 Barcelona, Spain.

\*Corresponding author

Email addresses:

MK: [mkogenaru@yahoo.com](mailto:mkogenaru@yahoo.com)

SJT: [tans@amolf.nl](mailto:tans@amolf.nl)

#### 1. Strain engineering

We selected a 40 base pairs (bps) regions from the 5' and 3' ends of the *lacI* as a homology arms and added this to the either ends of the chloramphenicol acetyltransferase (*cat*) selection cassette. This cassette is in turn flanked by the Cre recombinase recognition loxP sites[1]. This whole construct was PCR amplified as a single product and digested with 10 U of *DpnI* for 2 hours at 37 °C. This digested product was further purified by loading on to the agarose gel, before transforming into the parental BW27783 strain by electroporation. Prior to this, the BW27783 was transformed with the phage lambda-derived Red recombinase encoding helper plasmid pKD46[2] (GenBank™ Accession number AY048746). The transformants from the *lacI* deletion were selected on the LB agar plate containing 15 µg/ml Chloramphenicol. The resulting chloramphenicol-resistant clones were screened for the positive recombinants by colony PCR. The confirmed positive clone was further colony-purified once under non-selective condition at 37 °C, and subsequently tested for Ampicillin sensitivity to confirm the loss of the helper plasmid. This clone was further verified for the desired mutation.

V2LacI-del\_fr

[GTGAAACCAGTAACGTTATACGATGTCGCAGAGTATGCCGAGGAAGCGGAATTCGGACC](#)

V2LacI-del\_rv

[TCACTGCCCGCTTTCAGTCGGGAAACCTGTCGTGCCAGCTACCGTCGACGGATCCCCGG](#)

*lacI*

>gi|1657477|gb|U73857.1|ECU73857 Escherichia coli str. K-12 substr. MG1655  
GAACAACGGGTGATTGGCTGTCTGAATCTGGTGTATATGGCGAGCGCAATGACCATTGAACAGGCAGCGGAAAAGCATCT  
TCCGGCGCTACAACGGGTAGCAAAACAGATCGAAGAAGGGGTGAATCGCAGGCTATTCTGGTGGCCGGAAGGCGAAGCG  
GCATGCATTTACGTTGACACCATCGAATGGCGCAAAACCTTTCGCGGTATGGCATGATAGCGCCCGGAAGAGAGTCAATT  
CAGGGTGGTGAATGTGAAACCAGTAACGTTATACGATGTCGCAGAGTATGCCGGTGTCTTTATCAGACCCTTTCCCGCG  
TGTTGAAACCAGGCCAGCCACGTTTTCTGCGAAAACCGCGGAAAAGTGAAGCGGCGATGGCGGAGCTGAATTACATTTCCC  
AACCAGCGTGGCACAACAACCTGGCGGGCAAACAGTCGTTGCTGATTGGCGTTGCCACCTCCAGTCTGGCCCTGCACGCGCC  
GTCGCAAAATTGTCGCGCGATTAAATCTCGCGCCGATCAACTGGGTGCCAGCGTGGTGGTGTGATGGTAGAACGAAGCG  
GCGTCGAAGCCTGTAAAGCGGCGGTGCACAATCTTCTCGCGCAACCGCTCAGTGGGCTGATCATTAACTATCCGCTGGAT  
GACCAGGATGCCATTGCTGTGGAAGCTGCCCTGCACATAATGTTCCGGCGTTATTTCTTGATGTCTCTGACCAGACACCCAT  
CAACAGTATTTATTTCTCCCATGAAGACGGTACGCGACTGGGCGTGGAGCATCTGGTTCGATTGGGTACCAGCAAATCG  
CGCTGTTAGCGGGCCCATTAAGTTCTGTCTCGGCGCGTCTGCGTCTGGCTGGCTGGCATAAATATCTCACTCGCAATCAA  
ATTCAGCCGATAGCGGAACGGGAAGGCGACTGGAGTCCATGTCCGGTTTTCAACAAACCATGCAAATGCTGAATGAGGG  
CATCGTTCCCCTGCGATGCTGGTTGCCAACGATCAGATGGCGCTGGGCGCAATGCGCGCCATTACCGAGTCCGGGCTGC  
GCGTTGGTGGGATATCTCGGTAGTGGGATACGACGATACCGAAGACAGCTCATGTTATATCCCGCCGTCAACCACCATC  
AAACAGGATTTTCGCTGCTGGGGCAAACCAGCGTGGACCCTGCTGCAACTCTCTCAGGGCCAGGCGGTGAAGGGCAA  
TCAGCTGTTGCCCGTCTCACTGGTGAAGAAAACCACCTGGCGCCAATACGCAAACCGCTCTCCCCGCGCGTTGG  
CCGATTCATTAATGCAGCTGGCAGCAGGTTTTCCGACTGGAAGCGGGCAGTGAAGCGCAACGCAATTAATGTGAGTTA  
GC

*lacI* homology arm sequence

loxP sites

Chloramphenicol acetyltransferase antibiotic resistance gene

LacI-del-test\_rv

ACGTAAGAGGTTCCAACTTTCACC

LacI-del-test\_fr

CCCGCCCTGCCACTCATCGCAGTAC

LacIdel-test2\_fr

CGCAGGCTATTCTGGTGGCC

LacIdel-test2\_rv

TCACTGCCCCGCTTTCCAGTCCG

>MK01 sequence at engineered locus

GAACAACGGGTGATTGGCTGTCTGAATCTGGTGTATATGGCGAGCGCAATGACCATTGAACAGGCAGCGGAAAAGCATCT  
TCCGGCGCTACAACGGGTAGCAAAACAGATCGAAGAAGGGGTGAATCGCAGGCTATTCTGGTGGCCGGAAGGCGAAGCG  
GCATGCATTTACGTTGACACCATCGAATGGCGCAAAACCTTTCGCGGTATGGCATGATAGCGCCCGGAAGAGAGTCAATT  
CAGGGTGGTGAATGTGAAACCAGTAACGTTATACGATGTCGCAGAGTATGCCGAGGAAGCGGAATTCGGACCGGCGCGC  
CAAAAAAACCCGCCGAAGCGGGTTTTTTTTCCCGGGATAACTTCGTATAATGTATGCTATACGAAGTTATCGATTACGCC  
CGCCCTGCCACTCATCGCAGTACGTTGTGAATTCATTAAGCATCTGCCGACATGGAAGCCATCACAAACGGCATGATGA  
ACCTGAATCGCCAGCGGCATCAGCACCTTGTGCGCTTGGCTATAATATTTGCCCATGGTGAAGAACGGGGCGAAGAAGTT  
GTCCATATTGGCCACGTTTAAATCAAACTGGTGAAGCTCACCCAGGGATTGGCTGAGACGAAAAACATATTCTCAATAA  
ACCCTTTAGGGAAATAGGCCAGTTTTTACCCTAACACGCCACATCTTGCGAATATATGTGTAGAAACTGCCGAAATCG  
TCGTGGTATTCACTCCAGAGCGATGAAAACGTTTTAGTTTTGCTCATGGAAGAACGGTGTAAACAGGGTGAACACTATCCCA  
TATCACCAGCTCACCGTCTTTTCATTGCCATACGGAATTCGGATGAGCATTATCAGGCGGGCAAGAATGTGAATAAAGG  
CCGGATAAAACTTGTGCTTATTTTTCTTTACGGTCTTTAAAAGGCCGTAATATCCAGCTGAACGGTCTGGTTATAGGTA  
CATTGAGCAACTGACTGAAATGCCCTCAAAATGTTCTTTACGATGCCATTGGGATATATCAACGGTGGTATATCCAGTGAT  
TTTTTTCTCCATTTTAGCTTCCTTAGCTCCTGAAAATCTCGATAACTCAAAAAATACGCCCGGTAGTGATCTTATTTTCAT  
TATGGTGAAAGTTGGAACCTCTTACGTGCCAATCGATAACTTCGTATAATGTATGCTATACGAAGTTATCCCGGGGATCC  
GTCGACGGTAGCTGGCAGCAGGTTTTCCCGACTGGAAGCGGGCAGTGA

## 2. DNA constructs

### 2.1 Construction of the plasmids used in the competition assay

The gene *lacI* along with the promoter *lacI*<sup>Q</sup> were amplified from pET-28b+ vector (Novagen) as a template. The *eYFP* gene was amplified from the in-house plasmid pLacImCherry-eYFP (M.K. and

S.J.T, unpublished) as a template. Using these two PCR products as a template, an overlap PCR was performed. The resulting PCR product was cloned onto the vector backbone of pLacImCherry-eYFP with XbaI and SalI restriction enzymes (Figure S2a). Similarly, *eYFP* was replaced with *mCherry* to obtain the construct that constitutively express (Figure S2b).

## **2.2 Construction of the plasmids used in the simultaneous induction assay**

The *araC-P<sub>BAD</sub>* part was PCR amplified from the in-house plasmid that is similar to the pBAD24 cloning vector (GenBank™ Accession number X81837). The resulting PCR product was cloned into pINV-110[3] plasmid backbone using AatII and XhoI restriction enzymes, to obtain an intermediate plasmid, pAraC. The *mCherry* sequence was cloned into the pAraC using EcoRI and XhoI restriction enzymes (Figure S3a).

The gene *lacI* along with its promoter was cloned into the vector backbone of pLacImCherry-eYFP using HindIII and SalI restriction enzymes (Figure S3b).

**Figure S1**

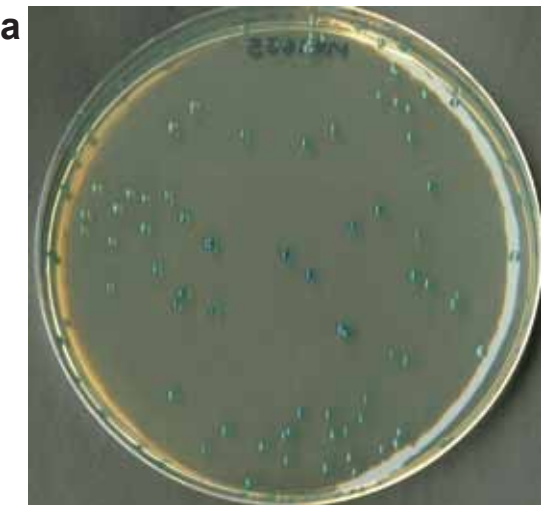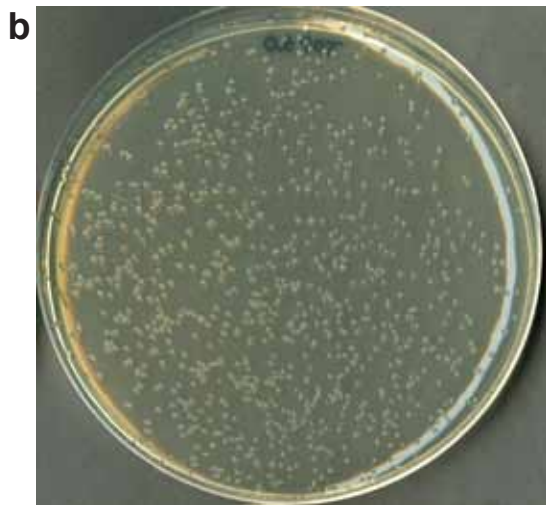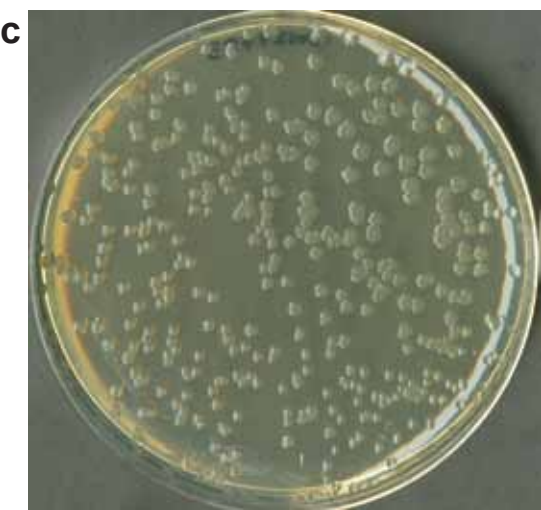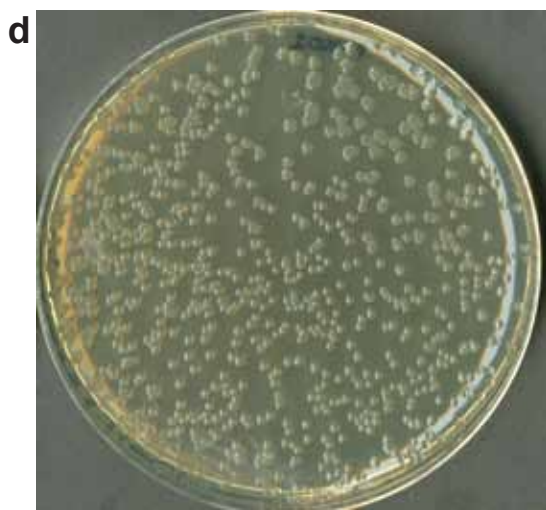

**Figure S2a**

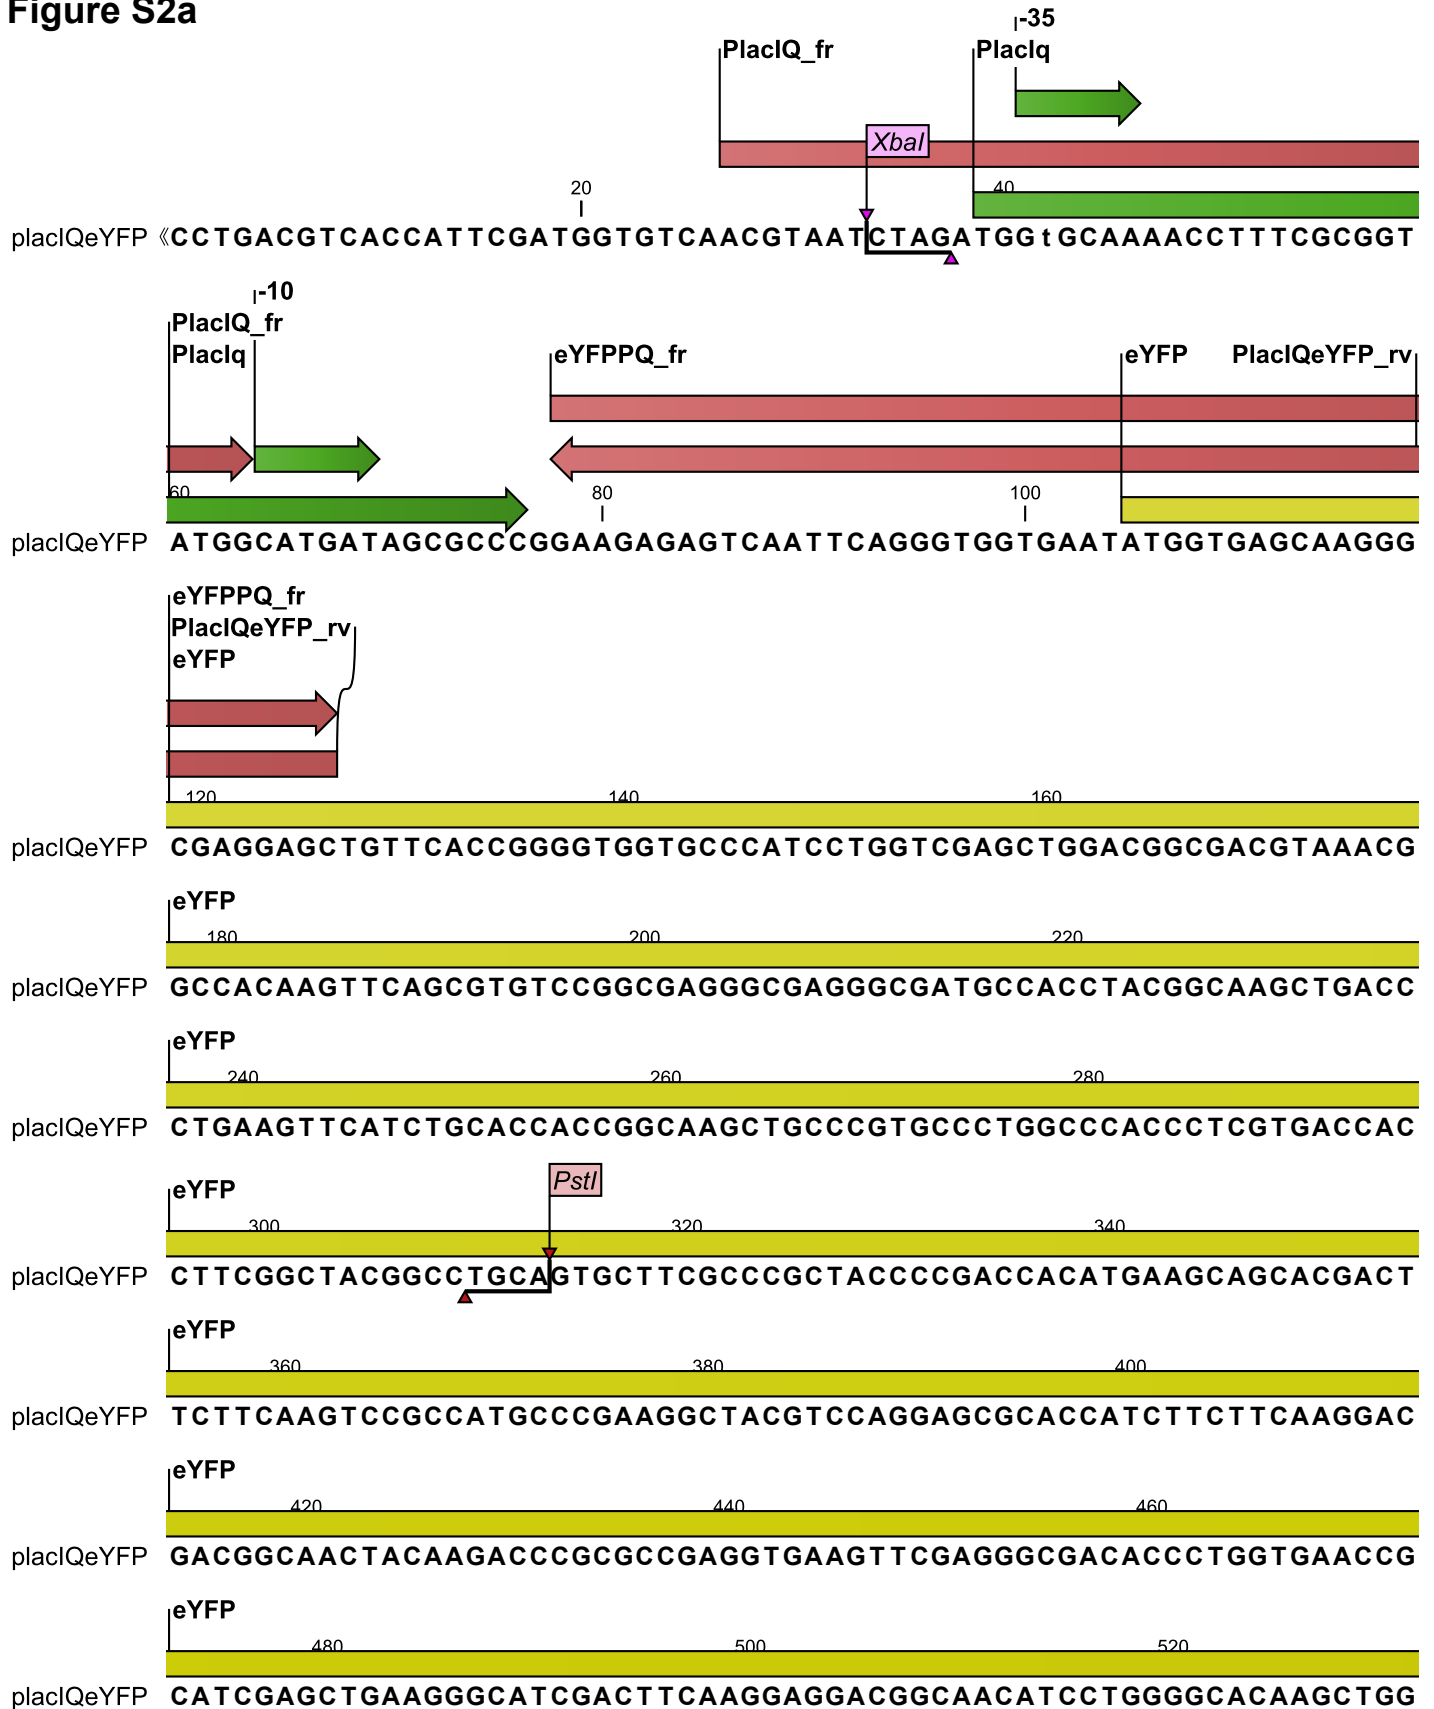

eYFP  
540 560 580  
placIQeYFP AGTACAAC TACAACAGCCACAACGTCTATATCATGGCCGACAAGCAGAAGAACGGCATC

eYFP  
600 620 640  
placIQeYFP AAGGTGAACTTCAAGATCCGCCACAACATCGAGGACGGCAGCGTGCAGCTCGCCGACCA

eYFP  
660 680 700  
placIQeYFP CTACCAGCAGAACACCCCATCGGGCAGGGCCCGTGCTGCTGCCGACAACCACTACC

eYFP  
720 740 760  
placIQeYFP TGAGCTACCAGTCCGCCCTGAGCAAAGACCCCAACGAGAAGCGCGATCACATGGTCTCTG

eYFP  
780 800 820  
placIQeYFP CTGGAGTTCGTGACCGCCGCGGGATCACTCTCGGCATGGACGAGCTGTACAAGTAACC

Sall-eYFP\_rv1

Sall-eYFP\_rv1  
T1 Term  
Sall  
840 860 880  
placIQeYFP TAGGGGAGTCGACCCGCTGCATCAAATAAACGAAAGGCTCAGTCGAAAGACTGGGCCT

T1 Term  
900 920 940  
placIQeYFP TTCGTTTTATCTGTTGTTTGTCCGGTGAACGCTCTCCTGAGTAGGACAAATCCGCCGCC

T1 Term  
XhoI  
960 980 1,000  
placIQeYFP TAGACTCGGCCGCTCTCGAGGTCTTCGGTTTCCGTGTTTCGTAAAGTCTGGAAACGCGGA

1,020 1,040 1,060

**Figure S2b**

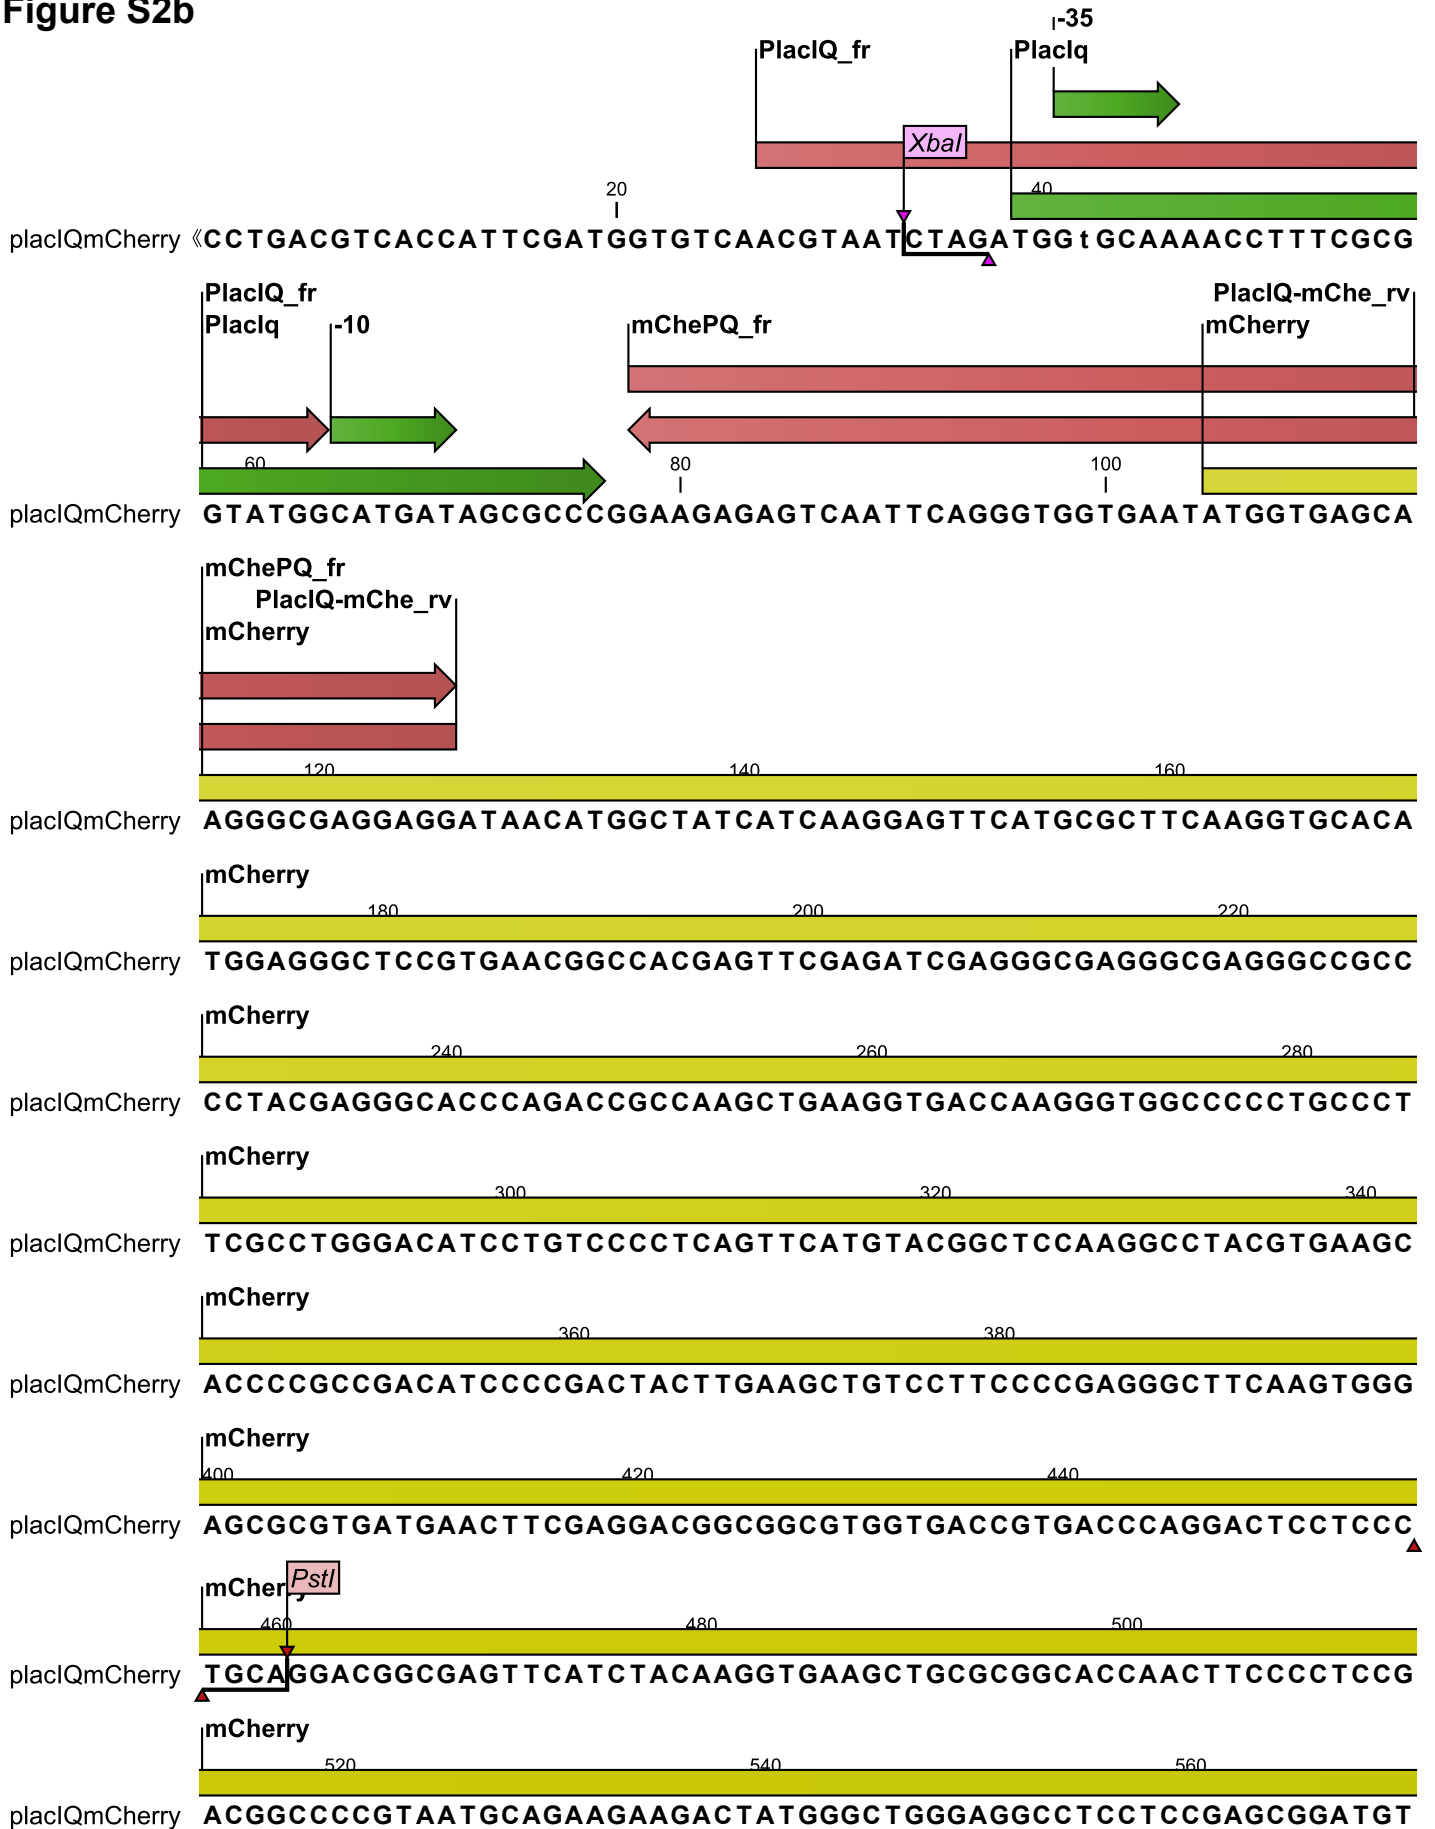

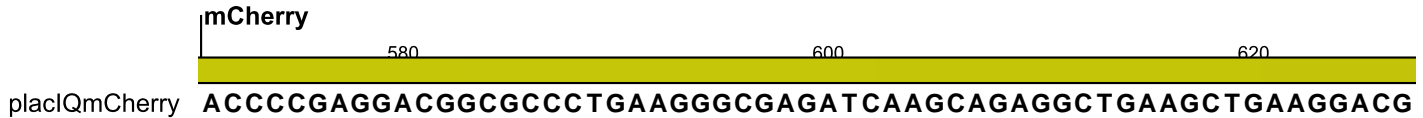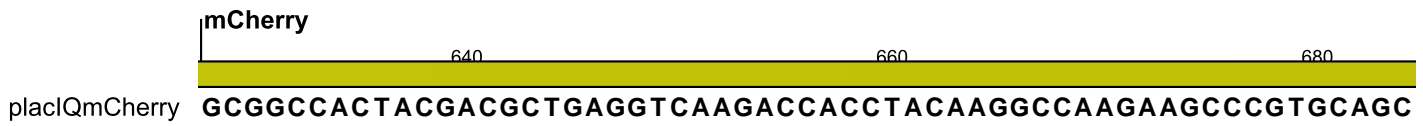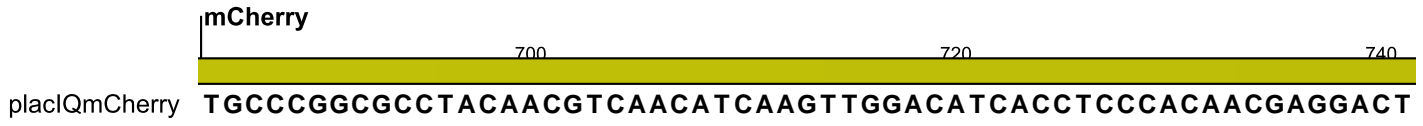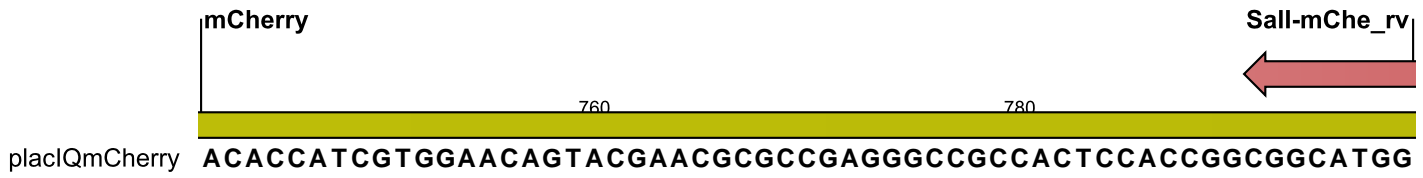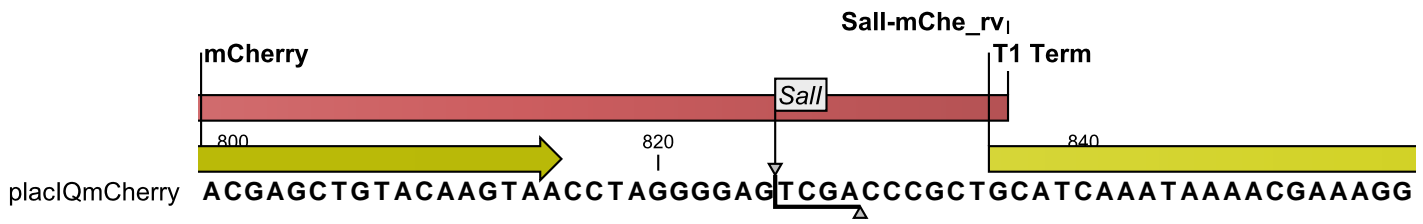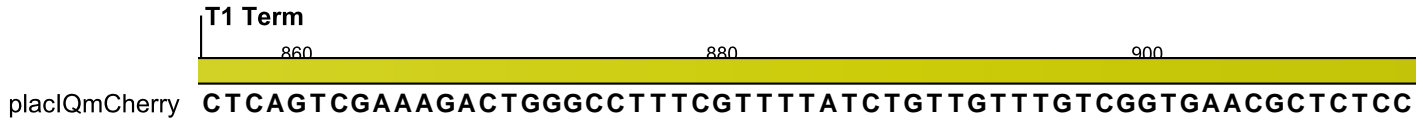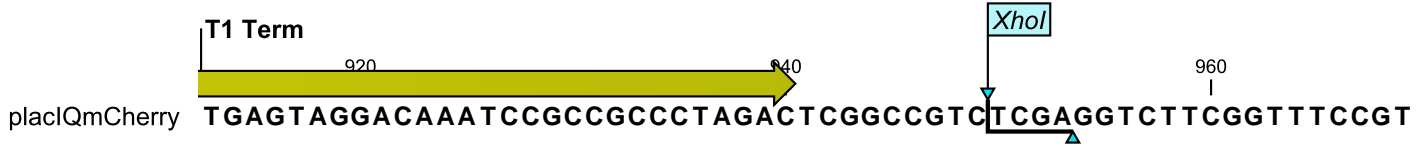



**Figure S3a**

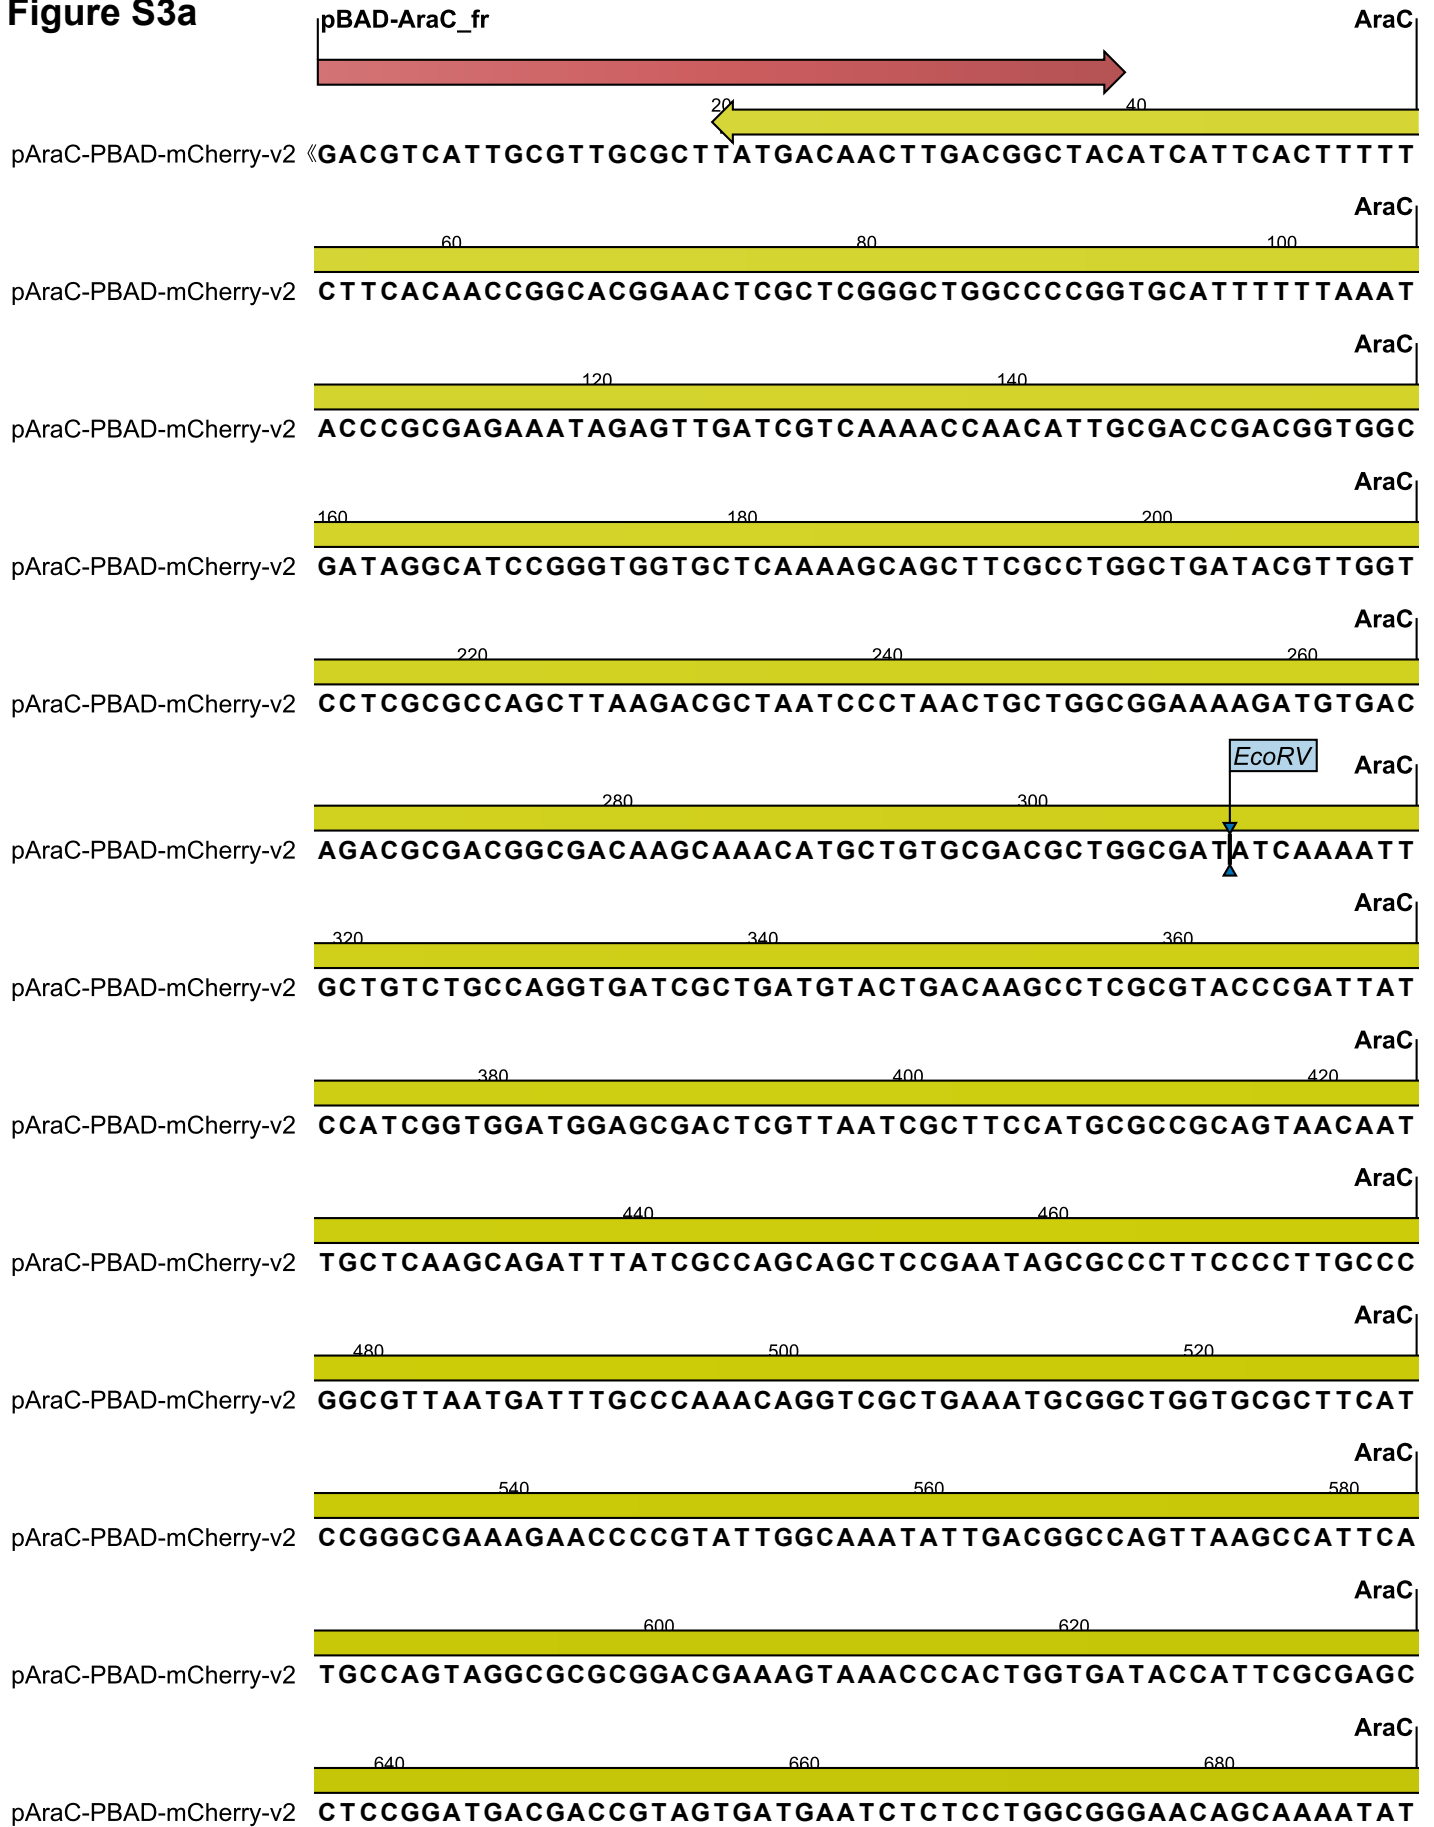

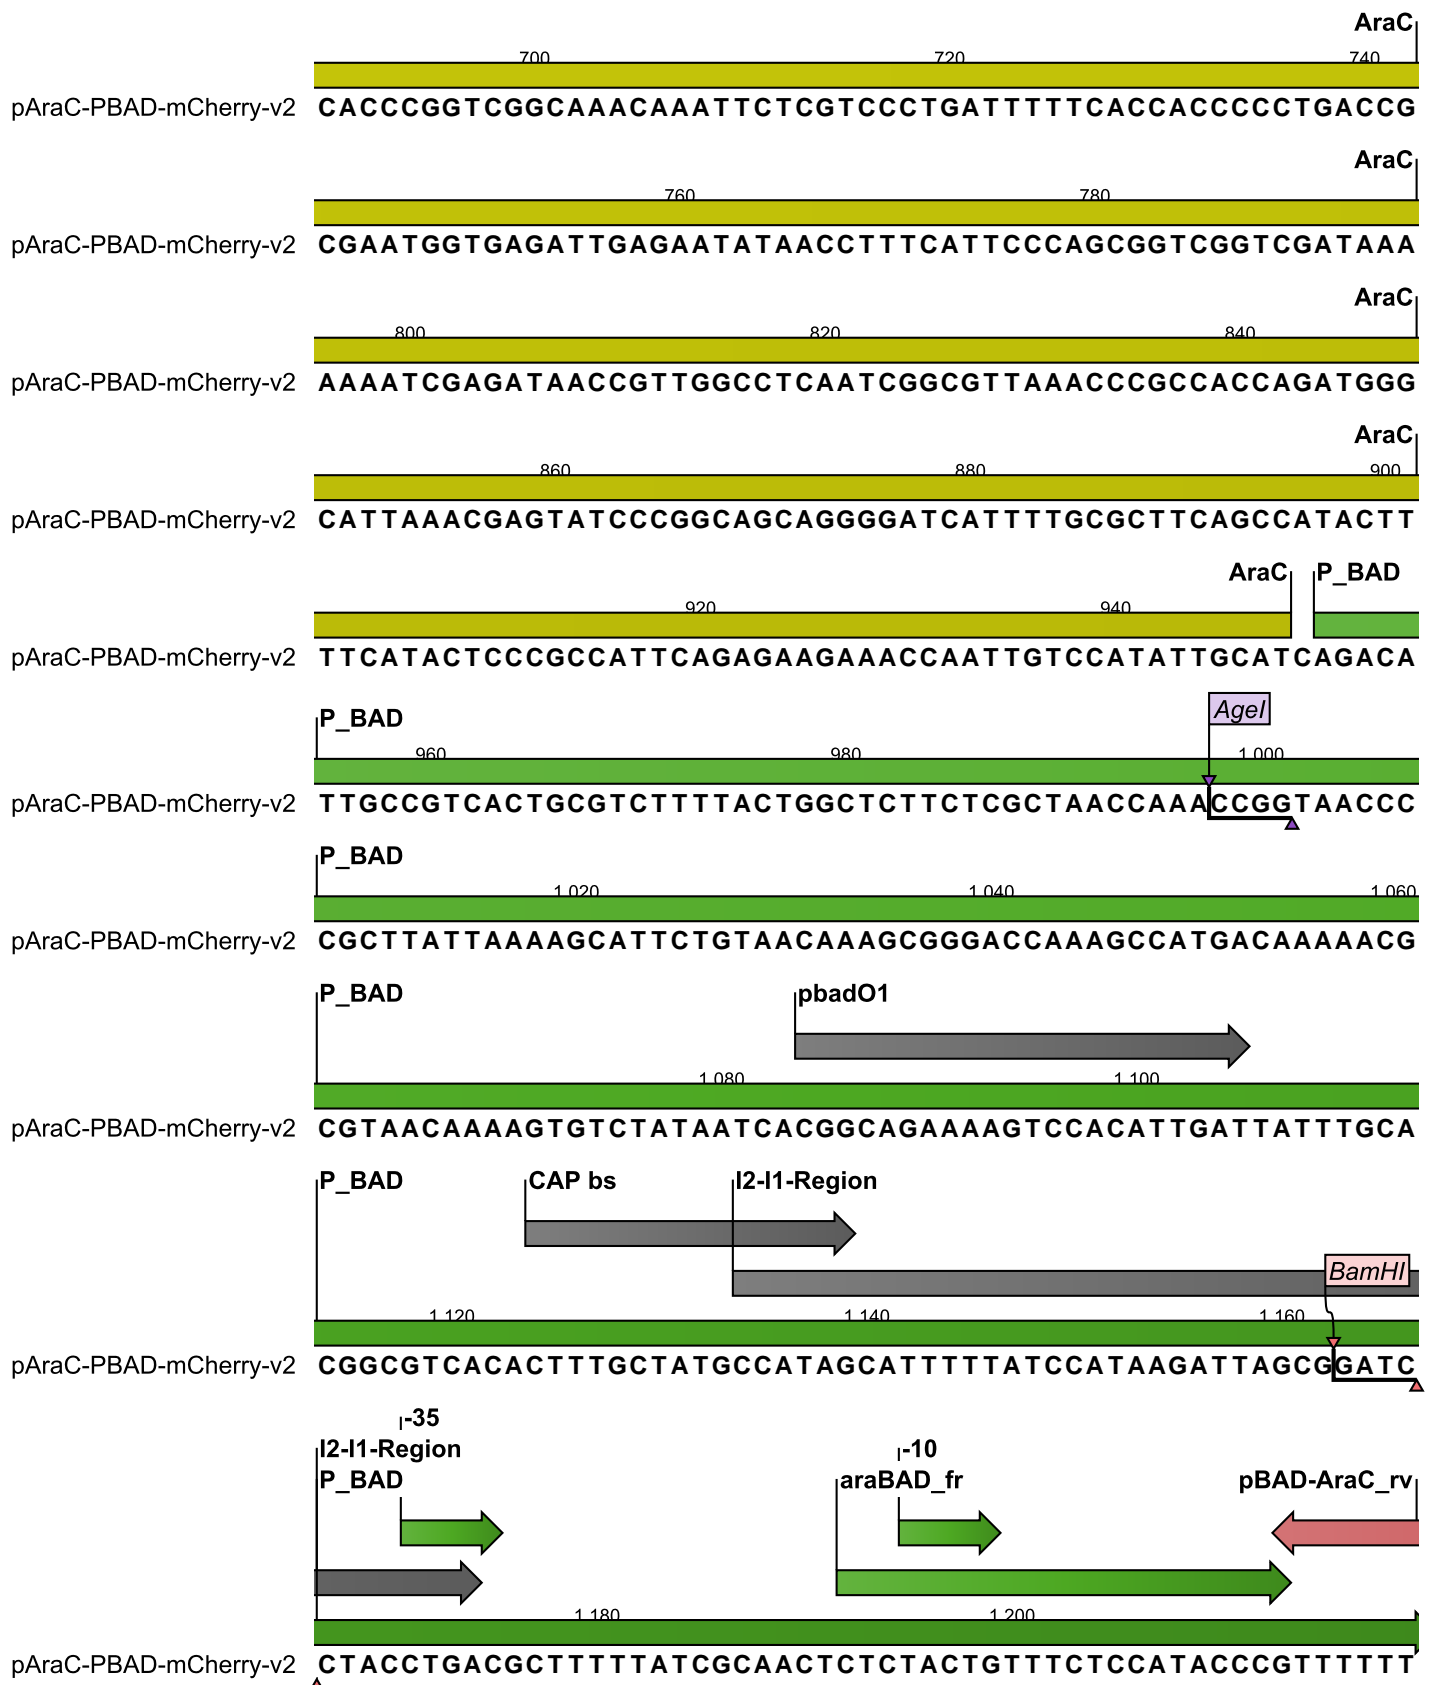

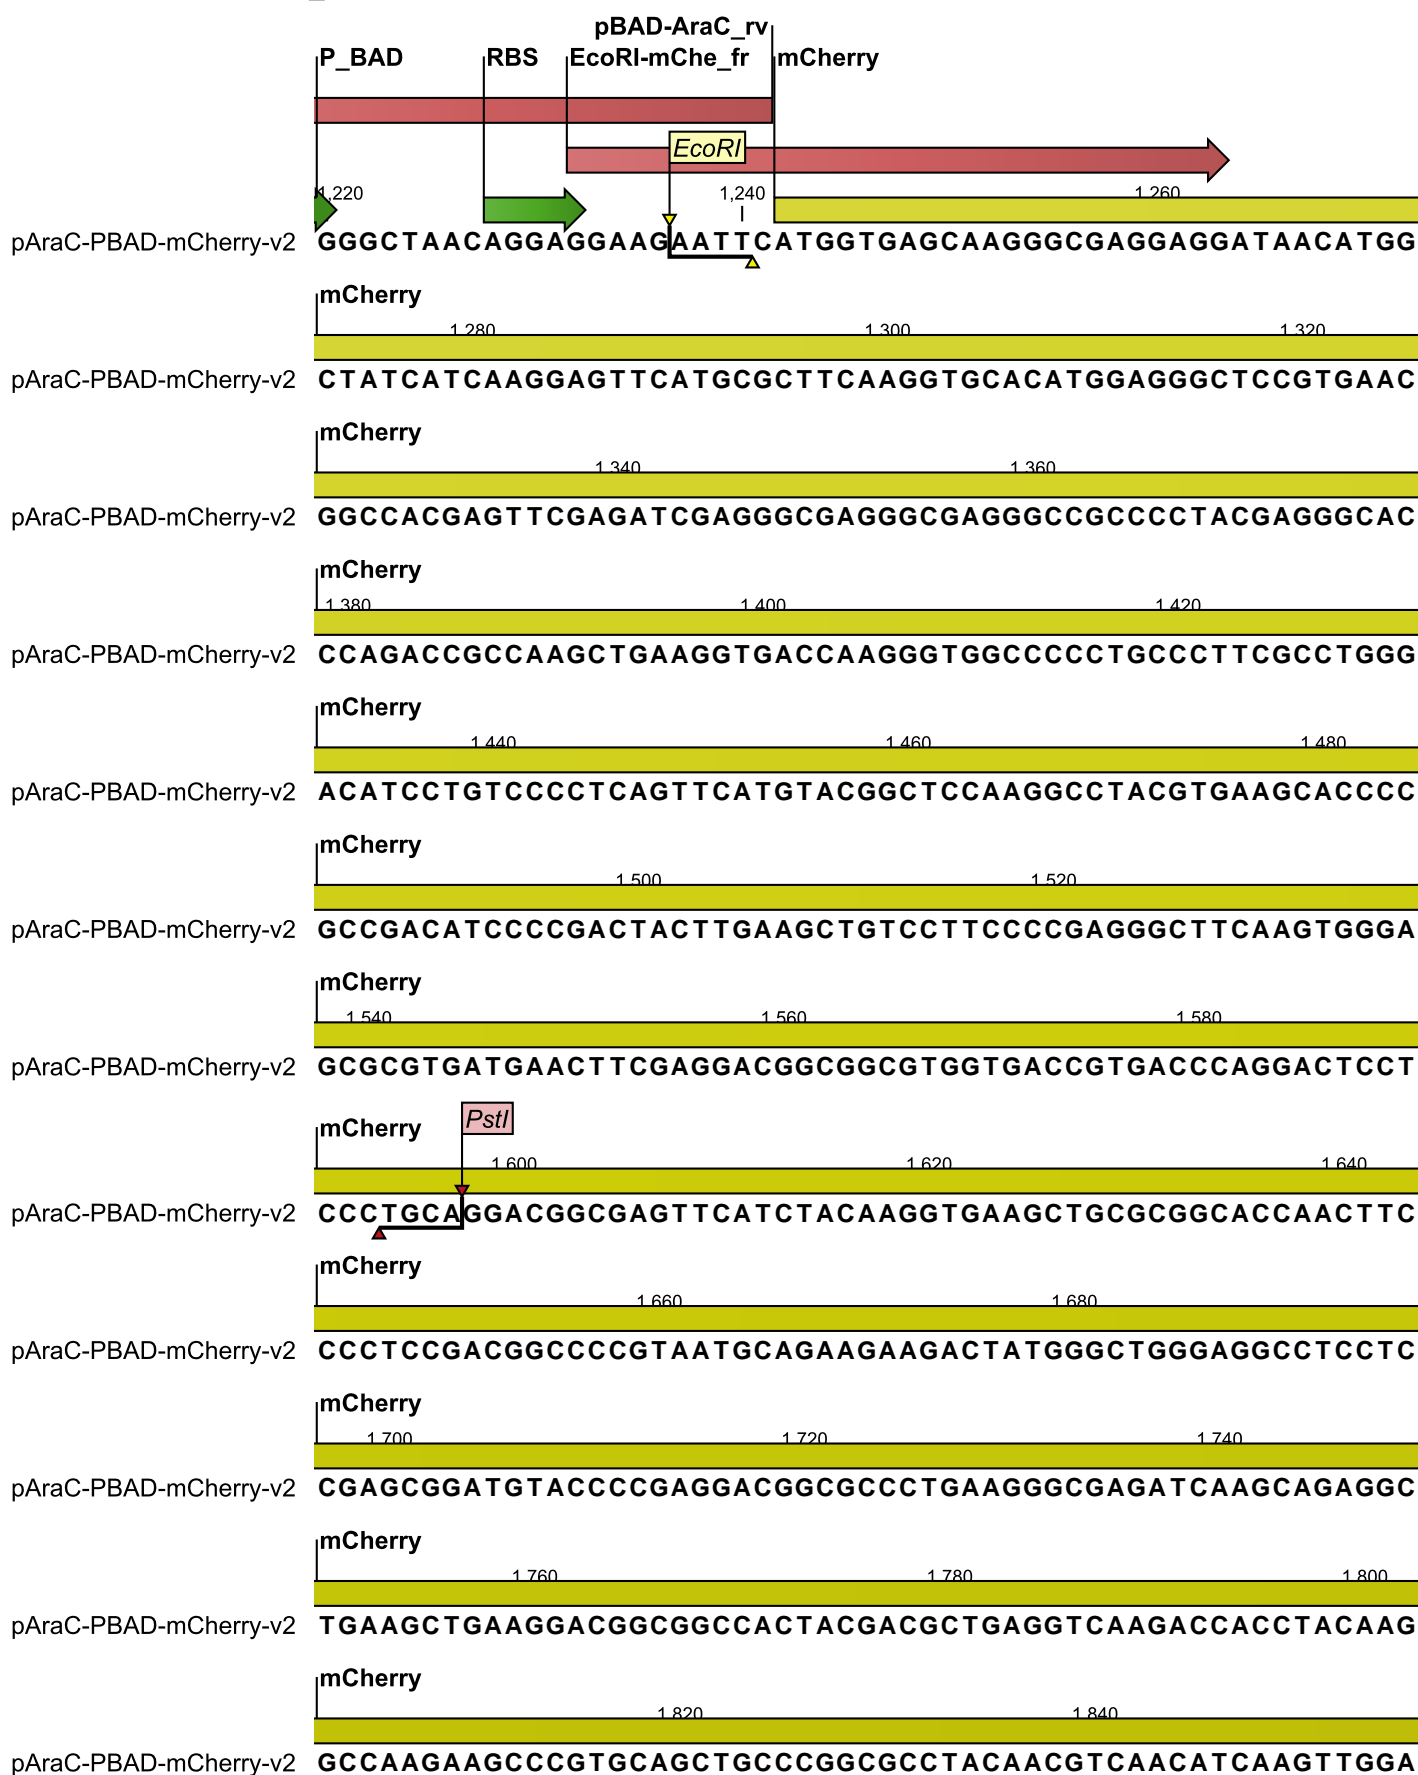

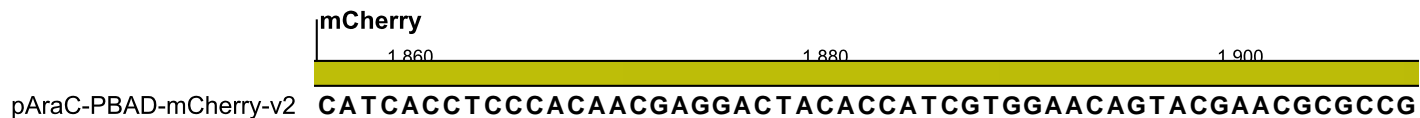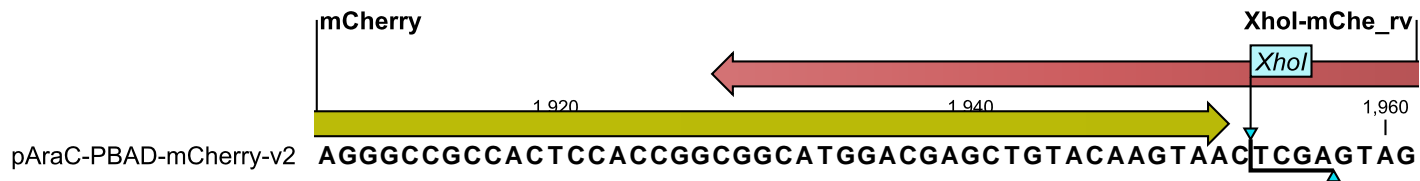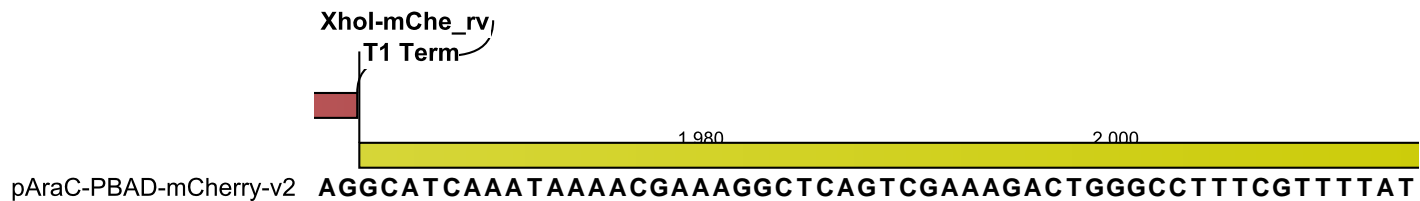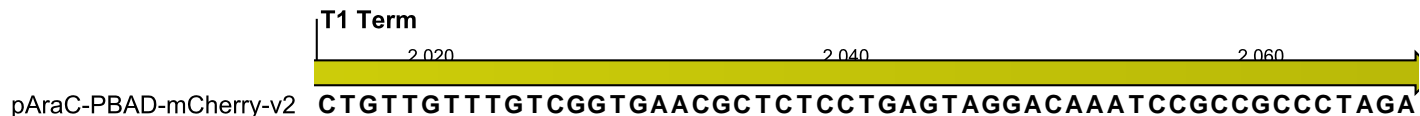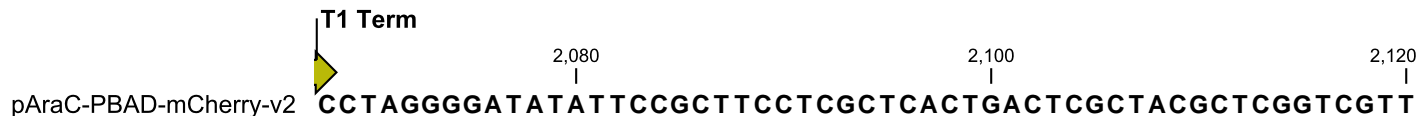

**Figure S3b**

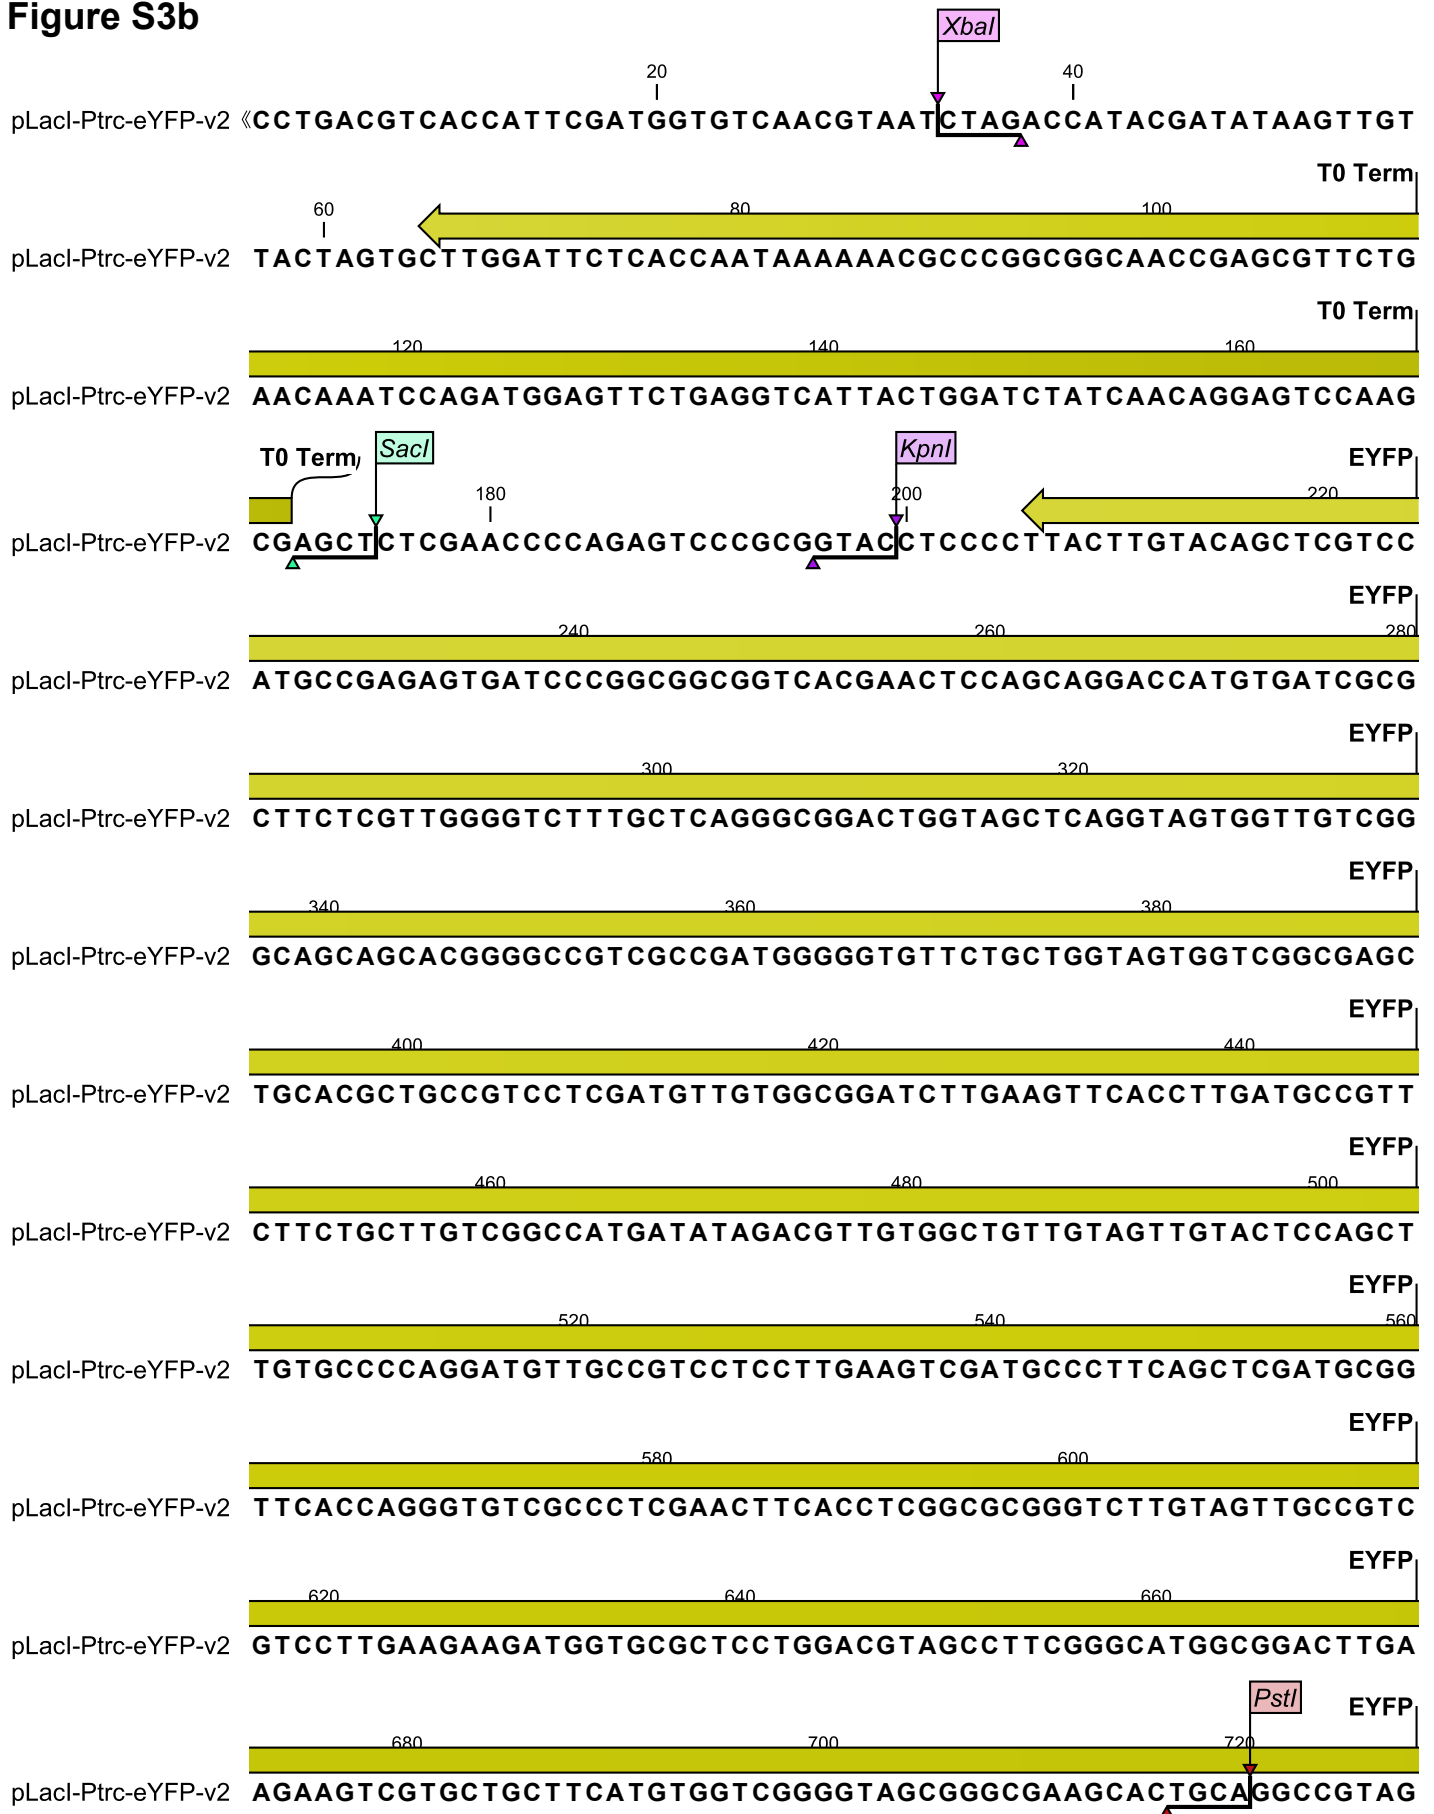

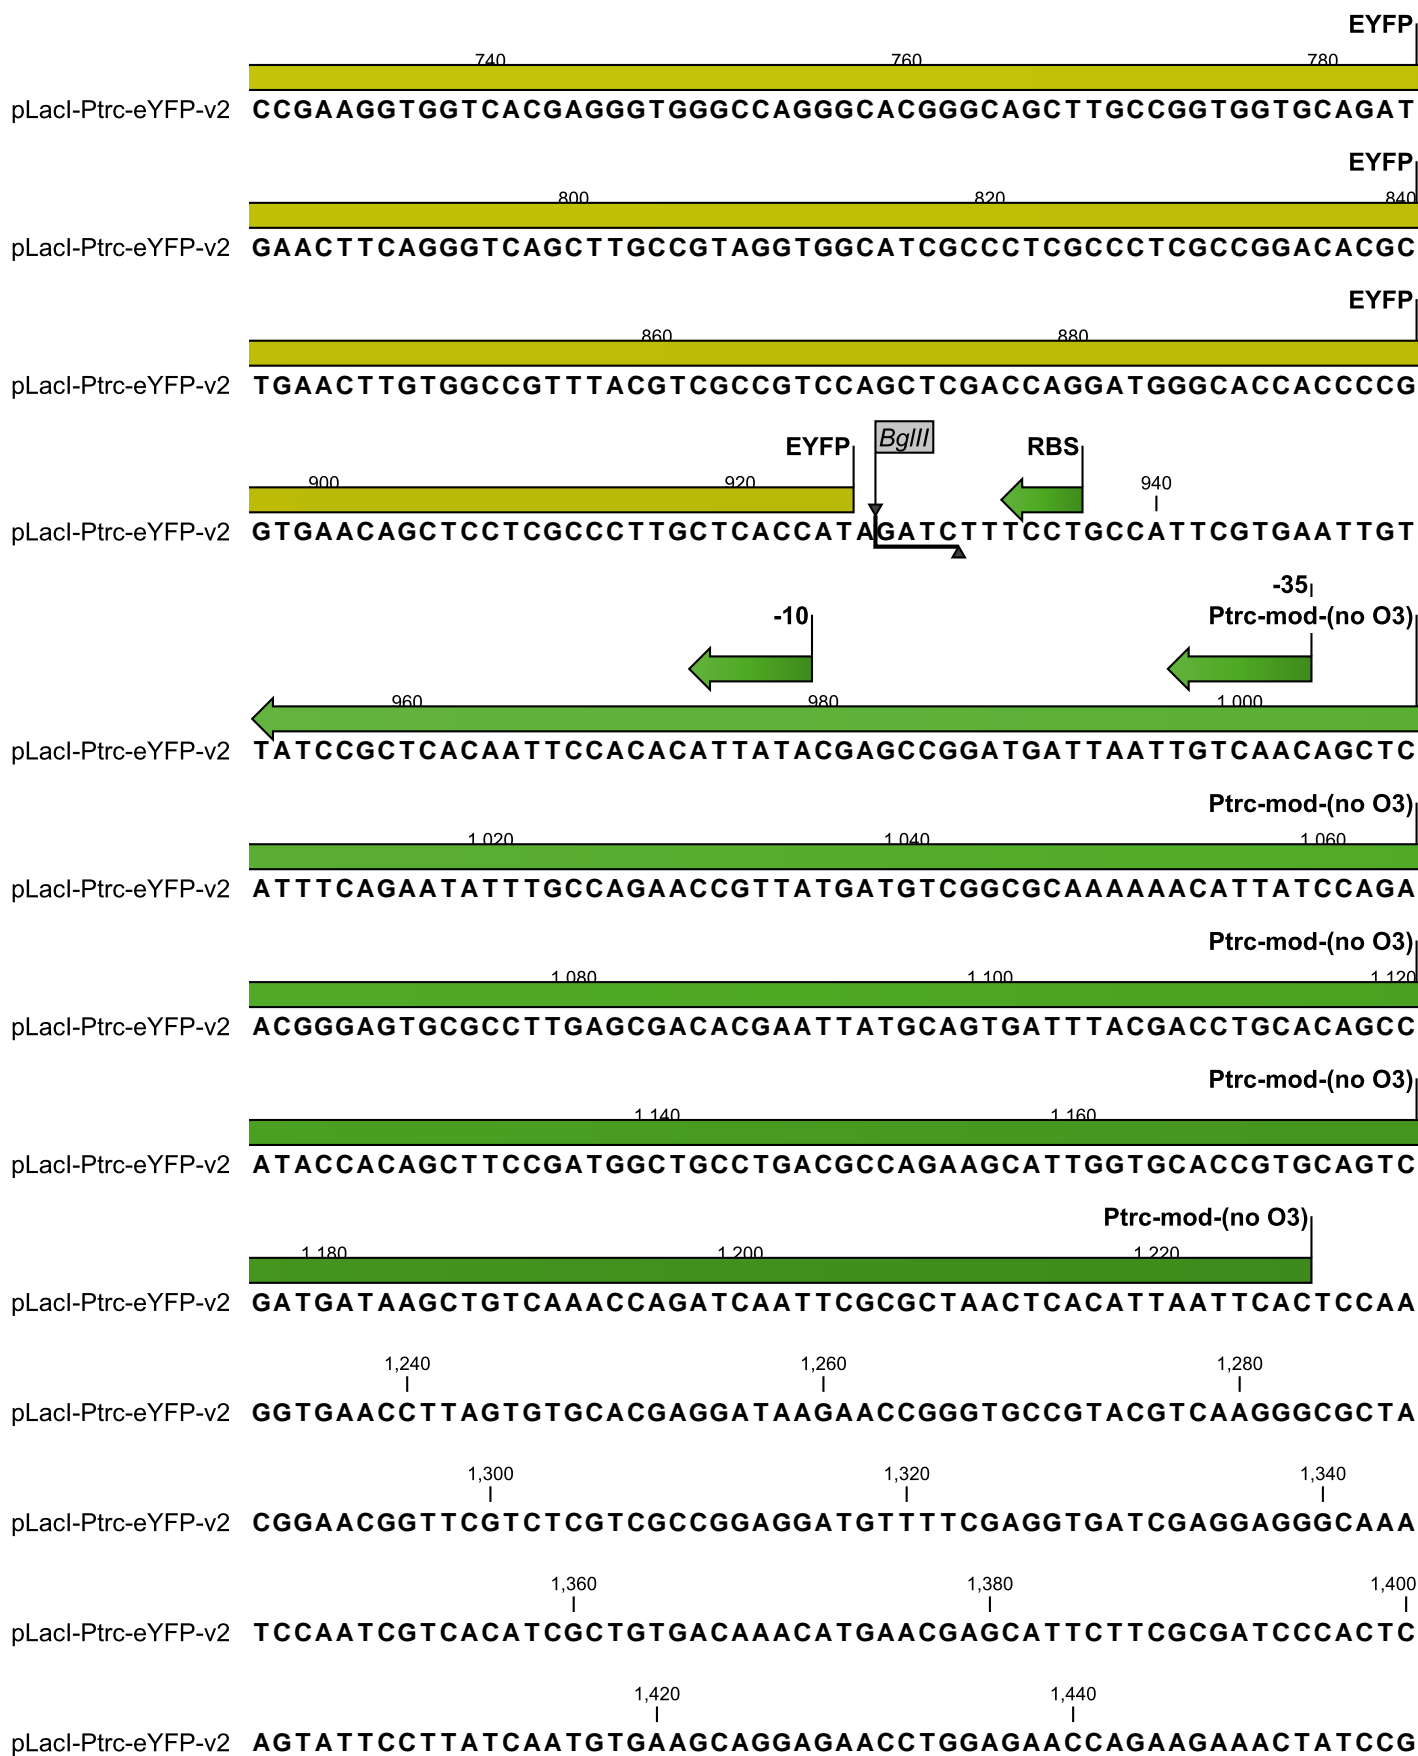

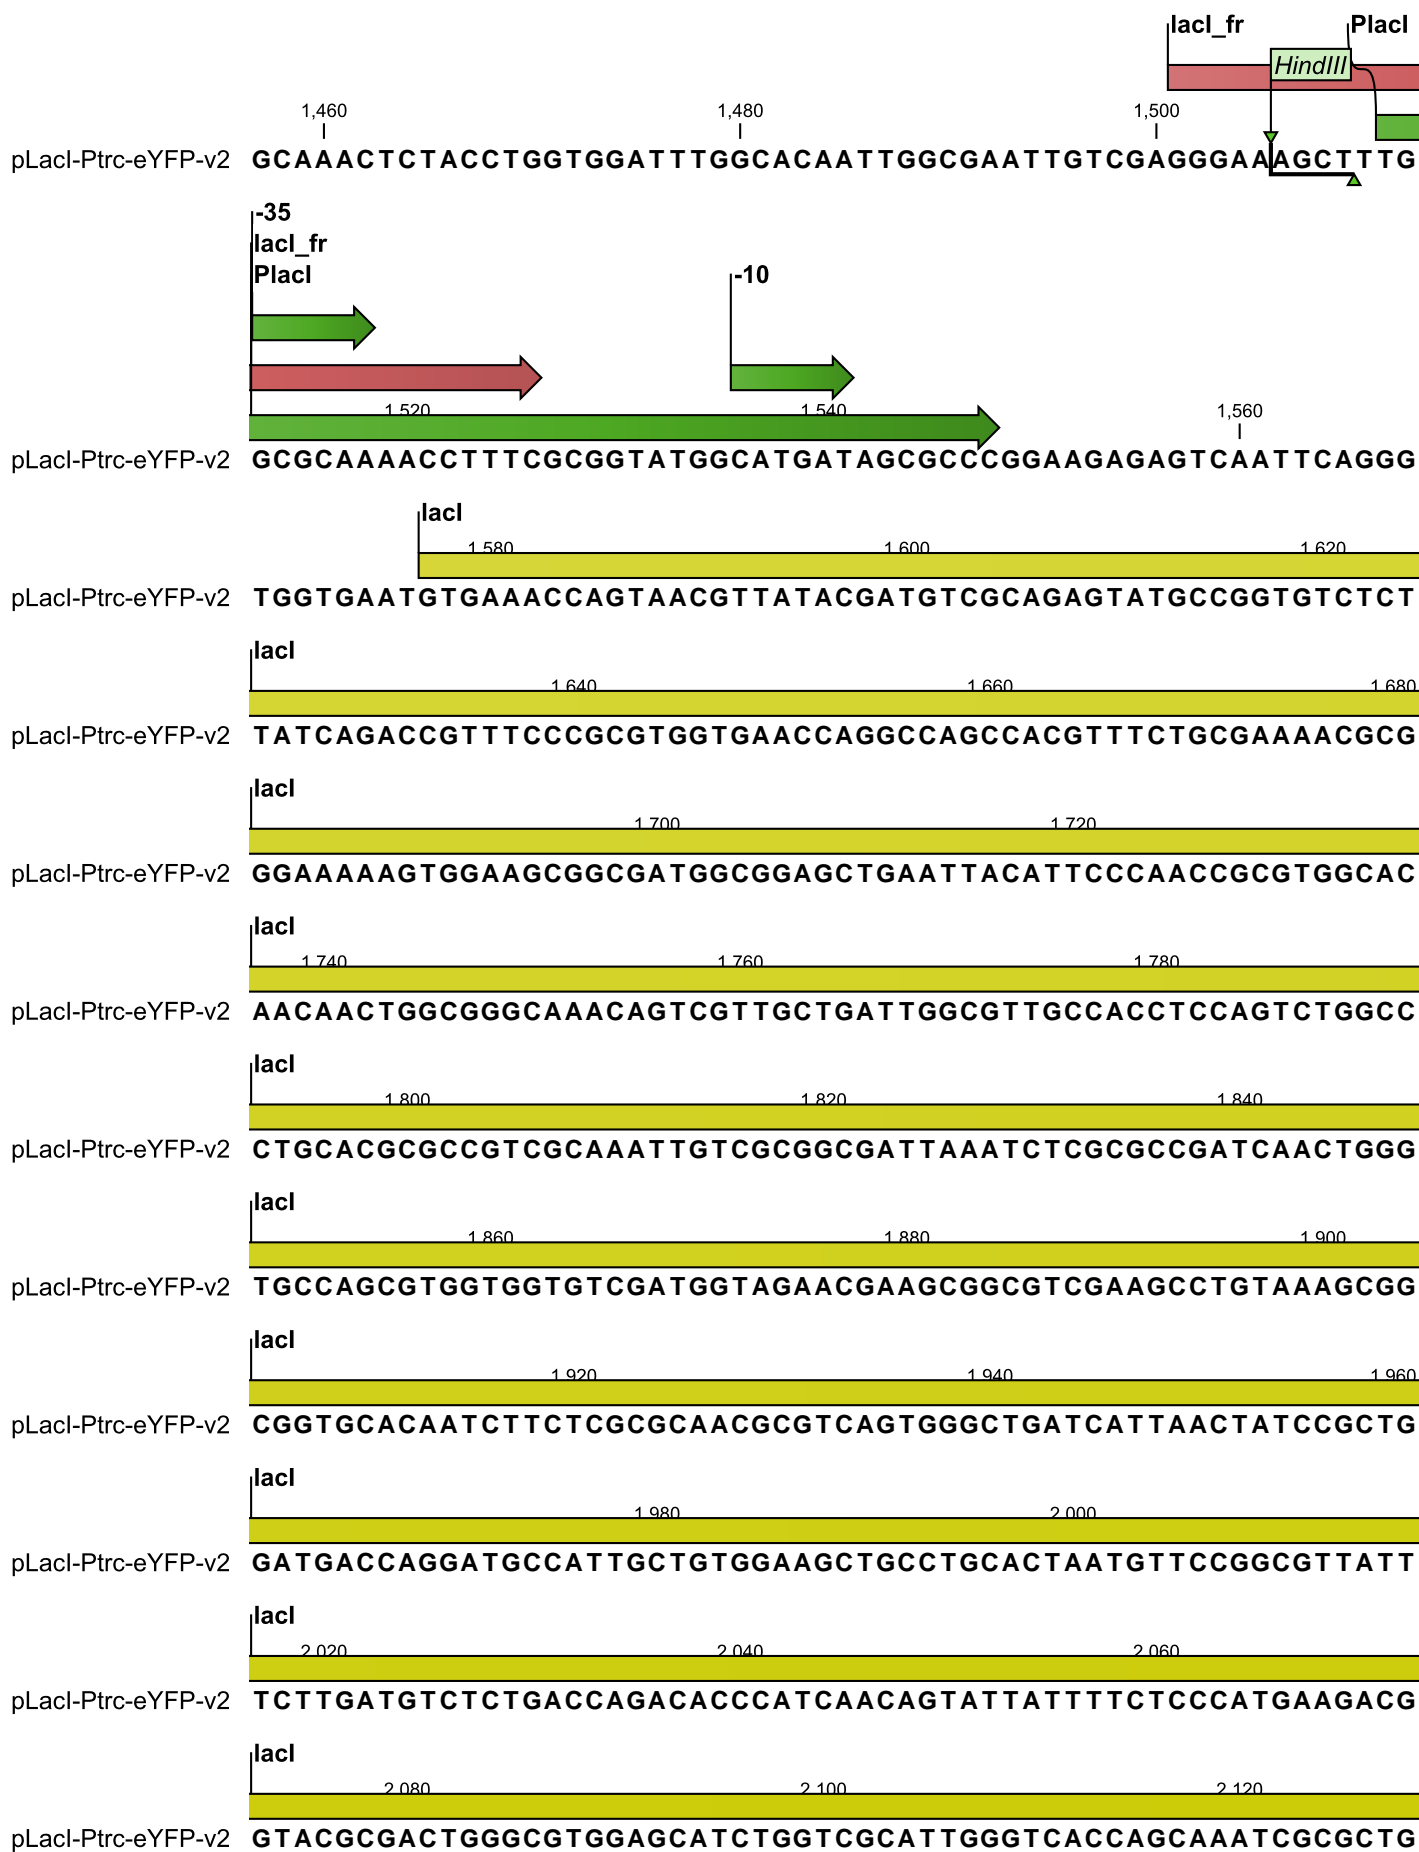

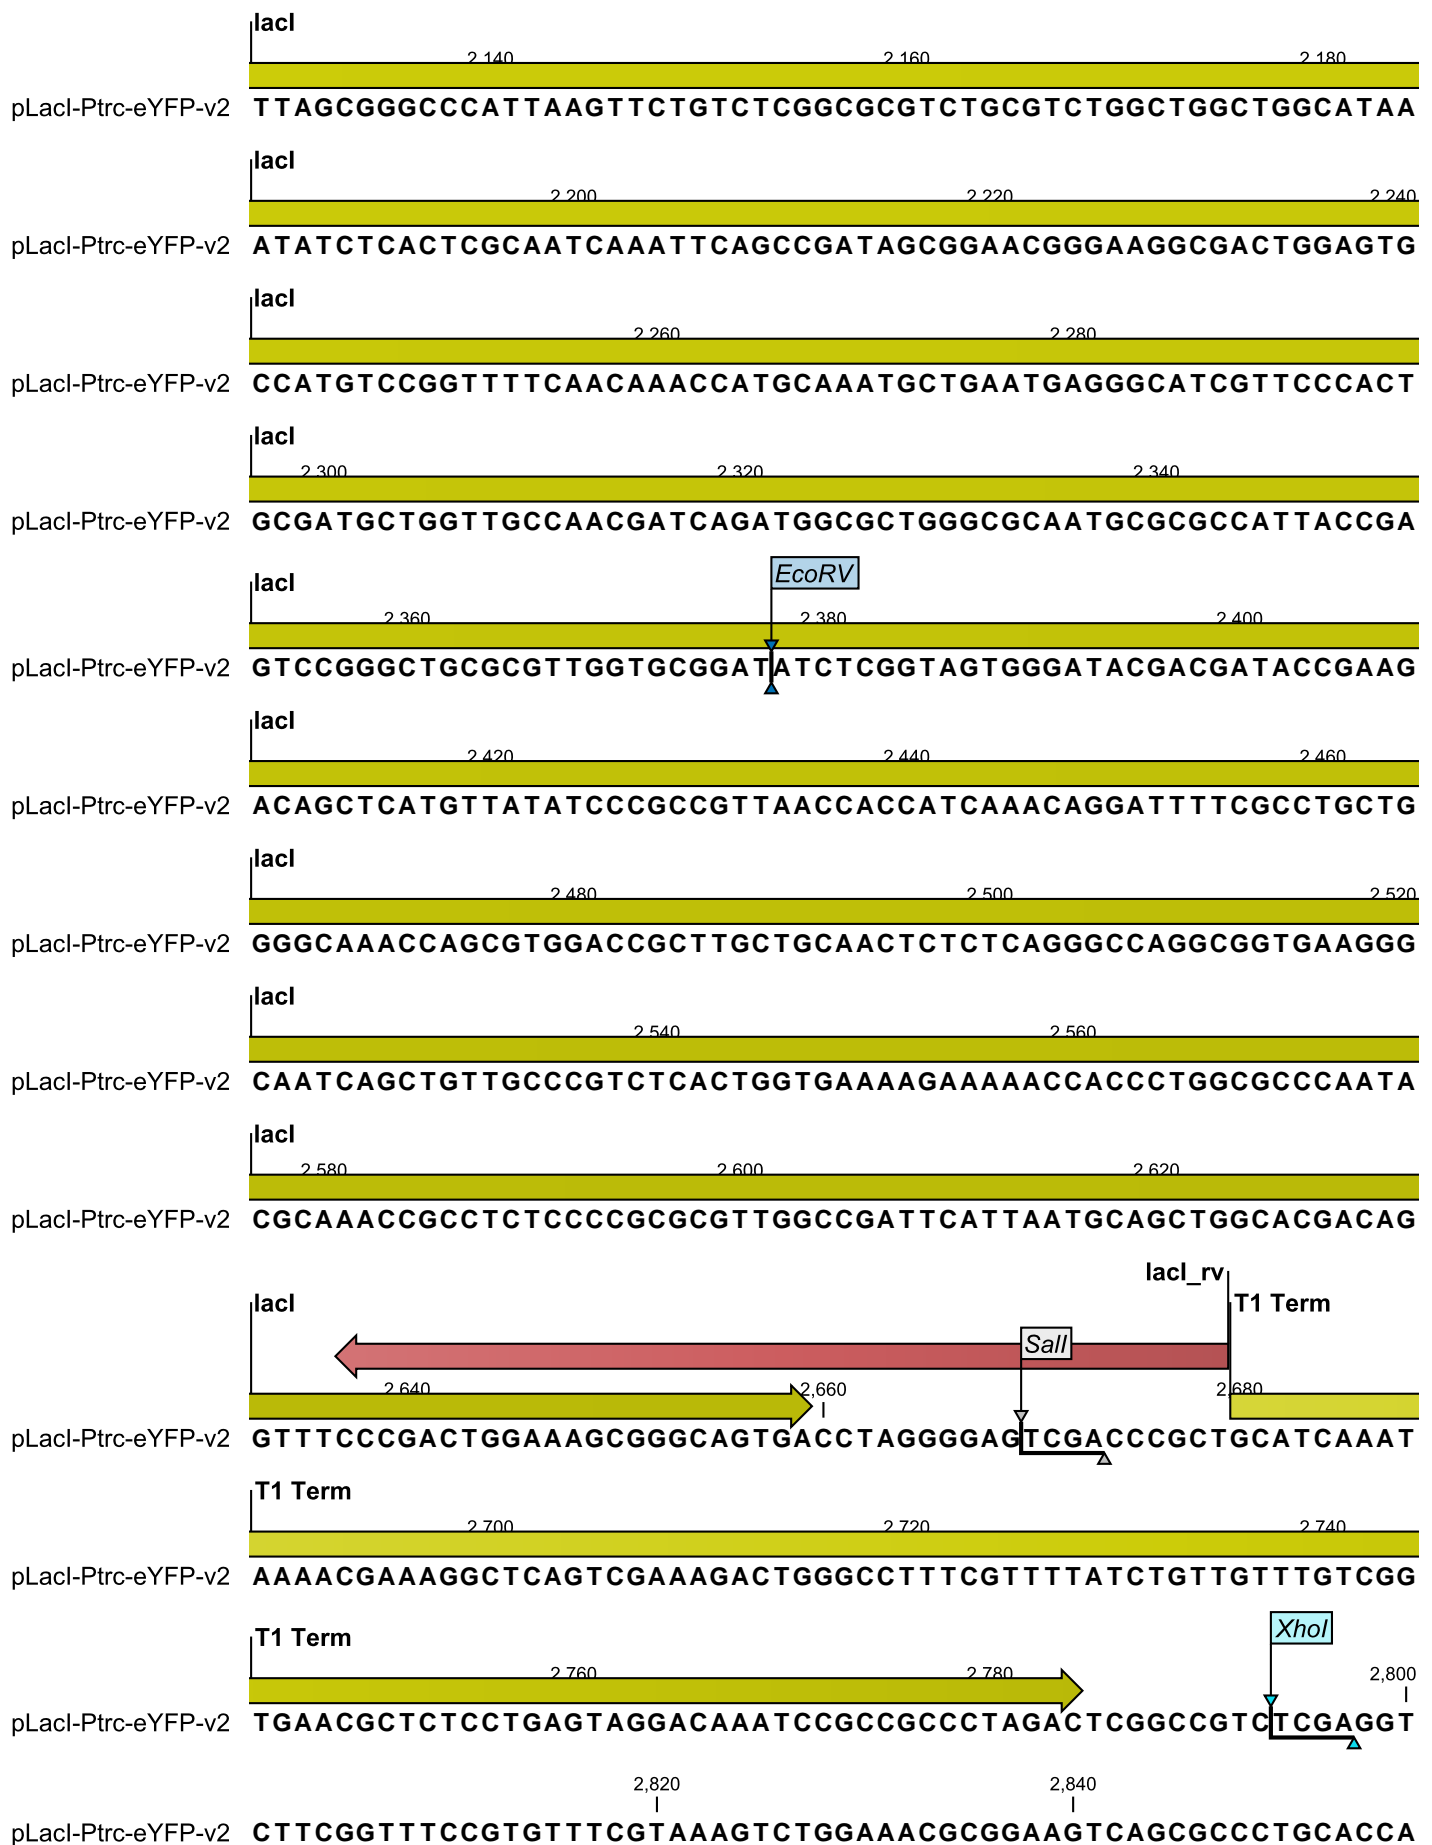



## References

1. Watt RM, Wang J, Leong M, Kung HF, Cheah KS, Liu D, Danchin A, Huang JD: **Visualizing the proteome of Escherichia coli: an efficient and versatile method for labeling chromosomal coding DNA sequences (CDSs) with fluorescent protein genes.** *Nucleic Acids Res* 2007, **35**:e37.
2. Datsenko KA, Wanner BL: **One-step inactivation of chromosomal genes in Escherichia coli K-12 using PCR products.** *PNAS* 2000, **97**:6640-6645.
3. Yokobayashi Y, Weiss R, Arnold FH: **Directed evolution of a genetic circuit.** *PNAS* 2002, **99**:16587-16591.
